# Supplementary material
Source: MDPI journal article supplement (https://www.mdpi.com/2073-445X/11/6/903)
Supplement: s1 [file s1 › land-1760861-supplementary.pdf]

Code \_\_\_\_\_

Checker \_\_\_\_\_

# The functional evolution and functional value calculation of rural homestead in hilly and mountainous areas of southwest China

## Household questionnaire

**Survey location:** \_\_\_\_\_ County (District) \_\_\_\_\_ Township (town) \_\_\_\_\_ Village

**Name of respondent:** \_\_\_\_\_ **Tel:** \_\_\_\_\_

**Investigator:** \_\_\_\_\_ **Tel:** \_\_\_\_\_

**Investigation time:** \_\_\_\_\_

**Table S1. Family members (\_\_\_\_)**

Total household population at the end of 2019 is \_\_\_\_; The nearest distance between the homestead and the market is \_\_\_\_Km; The distance from the nearest motorway is \_\_\_\_Km.

| Code |                                                                                                                                                                                                                                                                                                                                                                                                                                                     | Family members |   |   |   |   |   |   |
|------|-----------------------------------------------------------------------------------------------------------------------------------------------------------------------------------------------------------------------------------------------------------------------------------------------------------------------------------------------------------------------------------------------------------------------------------------------------|----------------|---|---|---|---|---|---|
|      |                                                                                                                                                                                                                                                                                                                                                                                                                                                     | 1              | 2 | 3 | 4 | 5 | 6 | 7 |
| 1    | Relationship with the head of household (1. Head of household 2. Spouse 3. Children or their spouses 4. Grandchildren or their spouses 5. Parents 6. Grandparents 7. Brothers and sisters 8. Others)                                                                                                                                                                                                                                                |                |   |   |   |   |   |   |
| 2    | Gender (1. male 2. female)                                                                                                                                                                                                                                                                                                                                                                                                                          |                |   |   |   |   |   |   |
| 3    | Ethnic group (1. Han 2. Hui 3. Miao 4. Hani 5. Dai 6. Yi 7. Dong 8. Tujia 9. Gelao 10. Manchu 11. others)                                                                                                                                                                                                                                                                                                                                           |                |   |   |   |   |   |   |
| 4    | Household registration type (1. Agriculture 2. Non agriculture 3. No household registration)                                                                                                                                                                                                                                                                                                                                                        |                |   |   |   |   |   |   |
| 5    | Age (years)                                                                                                                                                                                                                                                                                                                                                                                                                                         |                |   |   |   |   |   |   |
| 6    | Health status (1. No disease 2. Disease, please specify the specific disease)                                                                                                                                                                                                                                                                                                                                                                       |                |   |   |   |   |   |   |
| 7    | Education level (1. Illiterate 2. Primary school 3. Junior high school 4. High (vocational) middle school 5. College and above 6. Preschool age)                                                                                                                                                                                                                                                                                                    |                |   |   |   |   |   |   |
| 8    | Village cadre or not (1. Yes 2. No)                                                                                                                                                                                                                                                                                                                                                                                                                 |                |   |   |   |   |   |   |
| 9    | CPC member or not (1. Yes 2. No)                                                                                                                                                                                                                                                                                                                                                                                                                    |                |   |   |   |   |   |   |
| 10   | Main occupation (multiple choices) (1. Farming <sup>1</sup> =>11 2. Agricultural worker <sup>2</sup> =>12 3. Large professional/family farmer <sup>3</sup> =>14 4. Agricultural business owner <sup>4</sup> =>16 5. Self supporting industrial and commercial owner <sup>5</sup> =>19 6. Migrant workers =>21 7. Students 8. Domestic workers 9. Loss of labor ability 10. Workers in enterprises and institutions =>23 11. Others, please specify) |                |   |   |   |   |   |   |

- 
- 1 Farming: One is to plant one's own land, the other is to rent other people's land to plant one's own and rarely employ temporary agricultural workers.
- 2 Agricultural workers: Workers who work for large professional households, family farmers and farmers' cooperatives and earn income
- 3 Professional large household or family farm: A farmer who rents other people's land to engage in agricultural and animal husbandry activities and employs agricultural workers for a long time, while the family farm will temporarily employ many agricultural workers.
- 4 Agricultural enterprise: In the form of establishing a company, it engages in agricultural and animal husbandry activities integrating the planting, processing and sales of agricultural products by renting other people's land and employing agricultural workers for a long time
- 5 Self supporting industry and Commerce: Farmers use their own homestead to engage in commercial service industry and other production operators based on themselves and their family labor force.

|    |                                                                                                                                                           |  |  |  |  |  |  |  |
|----|-----------------------------------------------------------------------------------------------------------------------------------------------------------|--|--|--|--|--|--|--|
| 11 | Total farming time (month)                                                                                                                                |  |  |  |  |  |  |  |
| 12 | What specific jobs are agricultural workers mainly engaged in?                                                                                            |  |  |  |  |  |  |  |
| 13 | Average wage of agricultural workers (yuan / day)                                                                                                         |  |  |  |  |  |  |  |
| 14 | What kind of specific business does a large professional or family farmer mainly engage in?                                                               |  |  |  |  |  |  |  |
| 15 | Annual average income of professional large family or family farmers (yuan / year)                                                                        |  |  |  |  |  |  |  |
| 16 | What specific business does the agricultural business owner mainly engage in?                                                                             |  |  |  |  |  |  |  |
| 17 | Total working time of agricultural enterprise owner (month)                                                                                               |  |  |  |  |  |  |  |
| 18 | Average annual income of agricultural enterprise owners (yuan / year)                                                                                     |  |  |  |  |  |  |  |
| 19 | What specific business does the owner of self operated industry and commerce mainly engage in? (shops, restaurants, hotels, agritainment, homestay, etc.) |  |  |  |  |  |  |  |
| 20 | Annual average income of self operated industrial and commercial owners (yuan / year)                                                                     |  |  |  |  |  |  |  |
| 21 | What is the specific occupation of migrant workers?                                                                                                       |  |  |  |  |  |  |  |
| 22 | Annual average income of migrant workers, including bonus and allowance (yuan / year)                                                                     |  |  |  |  |  |  |  |
| 23 | What is the specific occupation of workers in enterprises and institutions?                                                                               |  |  |  |  |  |  |  |
| 24 | Fixed salary of enterprises and institutions (month)                                                                                                      |  |  |  |  |  |  |  |
| 25 | Performance and bonus of enterprises and institutions (year)                                                                                              |  |  |  |  |  |  |  |

**Table S2. Household income and expenditure (\_\_\_\_)**

**Table S2-1. Annual household income**

| Category                  |                                                                      | Amount (yuan) | Category       |                                                    | Quantity (mu) | Subsidy standard (yuan / mu) | Amount (yuan) |
|---------------------------|----------------------------------------------------------------------|---------------|----------------|----------------------------------------------------|---------------|------------------------------|---------------|
| Total agricultural income | Total income of planting industry (corn, potato, flue-cured tobacco, |               | Subsidy income | Comprehensive agricultural subsidies (direct grain |               |                              |               |

|                                                         |                                                                                           |  |                                                                                                                                                                               |  |  |  |
|---------------------------------------------------------|-------------------------------------------------------------------------------------------|--|-------------------------------------------------------------------------------------------------------------------------------------------------------------------------------|--|--|--|
|                                                         | etc.)                                                                                     |  | subsidies, etc.)                                                                                                                                                              |  |  |  |
|                                                         | Sales income of breeding industry (pigs, cattle, sheep, chickens, ducks, etc.)            |  | Subsidy for returning farmland to forest (grassland)                                                                                                                          |  |  |  |
|                                                         | Sales income from forest and animal husbandry planting (economic forest or pasture, etc.) |  | Endowment insurance (subsidy) (yuan / year)                                                                                                                                   |  |  |  |
|                                                         | Orchard sales revenue (apple, pear, apricot, etc.)                                        |  | Rural cooperative medical insurance (subsidy) (yuan / year)                                                                                                                   |  |  |  |
| Operating income of homestead commercial service        | Shop                                                                                      |  | Subsistence allowance (yuan / year)                                                                                                                                           |  |  |  |
|                                                         | Agritainment / Restaurant                                                                 |  | Disability subsidy (yuan / year)                                                                                                                                              |  |  |  |
|                                                         | Homestay / Hotel                                                                          |  | Other subsidies (Building subsidies, agricultural machinery subsidies, agricultural insurance, tree planting subsidies, cash crop subsidies, pigs, sheep and other subsidies) |  |  |  |
| Income of agricultural workers                          |                                                                                           |  |                                                                                                                                                                               |  |  |  |
| Income from migrant workers                             |                                                                                           |  |                                                                                                                                                                               |  |  |  |
| Income from land transfer out                           |                                                                                           |  |                                                                                                                                                                               |  |  |  |
| Wage income                                             |                                                                                           |  |                                                                                                                                                                               |  |  |  |
| Other income (Such as cash gift, share dividends, etc.) |                                                                                           |  |                                                                                                                                                                               |  |  |  |

Table S2-2. Annual household expenditure

| Category          | Amount (yuan) | Category                                      | Amount (yuan) |
|-------------------|---------------|-----------------------------------------------|---------------|
| Daily life        |               | Medical care                                  |               |
| Land rent         |               | Education                                     |               |
| Aquaculture input |               | House building / purchase                     |               |
| Planting input    |               | Purchase vehicle <sup>6</sup>                 |               |
|                   |               | Operating expenses of homestay (agritainment) |               |

<sup>6</sup> Vehicles mainly include battery cars, motorcycles, automobiles and other nonagricultural vehicles.

**Table S3. Utilization of rural homestead**

|                                   |                                                                           |                                                                                                                                                                                |                                                     |  |
|-----------------------------------|---------------------------------------------------------------------------|--------------------------------------------------------------------------------------------------------------------------------------------------------------------------------|-----------------------------------------------------|--|
| <b>Currently living homestead</b> | Whether have property right card                                          |                                                                                                                                                                                | Residential floor (which floor)                     |  |
|                                   | Homestead area(m <sup>2</sup> )                                           | House area_____, Courtyard area_____, Woodland area around the homestead_____, Vegetable field area_____, Breeding enclosure area_____, Homestay room_____, Area per room_____ |                                                     |  |
|                                   | House Structure                                                           | 1. Civil structure, 2. Adobe structure, 3. Brick and wood structure, 4. Stone and wood structure, 5. Brick-concrete structure                                                  |                                                     |  |
|                                   | Build time                                                                |                                                                                                                                                                                | Expected service life (years)                       |  |
|                                   | Construction or renovation cost (Ten thousand yuan)                       |                                                                                                                                                                                | Present value estimation (Ten thousand yuan)        |  |
|                                   | Whether collapse                                                          | 1. Yes, collapsed (1/2, 1/3, already collapsed), 2. No                                                                                                                         |                                                     |  |
|                                   | Current use/function                                                      | 1. Living. 2. Storing things. 3. Raising livestock. 4. Renting (rooms). 5. Commercial service operations (stores, restaurants, hotels, farmhouses, bed and breakfasts, etc.).  |                                                     |  |
|                                   | Whether you are willing to put the price of your home base into the stock | 1. Willingness. 2. Reluctance; the reason is _____                                                                                                                             |                                                     |  |
|                                   | Willingness to reclaim homesteads                                         | 1. Willingness. 2. Reluctance, the reason (Constraints) is _____                                                                                                               |                                                     |  |
| <b>Excess homestead</b>           | Whether have property right card                                          |                                                                                                                                                                                |                                                     |  |
|                                   | Homestead area(m <sup>2</sup> )                                           | Account area_____, Housing land area_____, Ancillary area (courtyard, forest, etc.)_____                                                                                       |                                                     |  |
|                                   | House Structure                                                           | 1. Civil structure, 2. Brick and wood structure, 3. Stone and wood structure, 4. Brick-concrete structure                                                                      |                                                     |  |
|                                   | Build time                                                                |                                                                                                                                                                                | Construction or renovation cost (Ten thousand yuan) |  |
|                                   | Present value estimation (Ten thousand yuan)                              |                                                                                                                                                                                |                                                     |  |
|                                   | Whether collapse                                                          | 1. Yes, collapsed (1/2, 1/3, already collapsed), 2. No                                                                                                                         |                                                     |  |
|                                   | Current use/function                                                      | 1. Living, 2. Storing things, 3. Raising livestock, 4. Renting (rooms), 5. Commercial service operations (stores, restaurants, hotels, farmhouses, bed and                     |                                                     |  |

|                                                                                                                             |                                          |                                                                                                                                                                                                                                                  |
|-----------------------------------------------------------------------------------------------------------------------------|------------------------------------------|--------------------------------------------------------------------------------------------------------------------------------------------------------------------------------------------------------------------------------------------------|
|                                                                                                                             |                                          | breakfasts, etc.).                                                                                                                                                                                                                               |
|                                                                                                                             | Homesteads<br>reclamation<br>willingness | 1. Willing, 2. Reluctance, the reason (Constraints) is _____                                                                                                                                                                                     |
| When did the function of the home base evolve significantly (annual)                                                        |                                          |                                                                                                                                                                                                                                                  |
| What was the main function before the evolution (multiple choices possible)                                                 |                                          | 1. Living accommodation, 2. Agricultural production (storage, breeding, handicraft workshops, yard planting, etc.), 3. Commercial service operation (stores, restaurants, hotels, farmhouses, etc.), 4. Other                                    |
| Do you understand the "one house per family" policy?                                                                        |                                          | 1. Yes, 2. Just heard about it, 3. No                                                                                                                                                                                                            |
| How satisfied you are with your current living situation?                                                                   |                                          | 1. Very satisfied, 2. More satisfied, 3. General, 4. Less satisfied, 5. Very dissatisfied                                                                                                                                                        |
| Aspects of dissatisfaction                                                                                                  |                                          | 1. Road traffic, 2. Upstream and downstream water, 3. The school, 4. Communication, 5. Medical treatment, 6. social security, 7. The environment; 8. Power, 9. Other                                                                             |
| If the demolition or renovation, how do you expect the government to subsidize?                                             |                                          | 1. Cash compensation, 2. Give buildings, 3. Cash compensation combined with buildings, 4. Others_____                                                                                                                                            |
| If the government encourages you to move into a building, what policies do you think the government should implement first? |                                          | 1. Medical insurance, unemployment insurance, endowment insurance and other insurance, 2. Provide stable urban jobs, 3. Help children with schooling 4. Others_____                                                                              |
| Are you satisfied with the new village house? (If have the case, you can ask)                                               |                                          | 1. Very satisfied, 2. More satisfied, 3. General, 4. Not very satisfied, 5. Not very satisfied                                                                                                                                                   |
| Reason for dissatisfaction (If have the case, you can ask)                                                                  |                                          | 1. The residential area is too small, 2. The farming radius is large, which is inconvenient for farming, 3. It is inconvenient for farming, 4. The function of the homestead cannot meet the needs, 5. The living infrastructure is not complete |

**Table S4. Interior structural of the current residential rural  
homestead**

| Homestead structural                                                            |                                     |                   | Length | Width | Area | Remark                  |
|---------------------------------------------------------------------------------|-------------------------------------|-------------------|--------|-------|------|-------------------------|
| Total area of homestead                                                         |                                     |                   |        |       |      |                         |
| Main room                                                                       | Bedroom                             | Bedroom 1         |        |       |      |                         |
|                                                                                 |                                     | Bedroom 2         |        |       |      |                         |
|                                                                                 |                                     | Bedroom 3         |        |       |      |                         |
|                                                                                 |                                     | Bedroom 4         |        |       |      |                         |
|                                                                                 |                                     | Bedroom 5         |        |       |      |                         |
|                                                                                 |                                     | Total (self-fill) |        |       |      |                         |
|                                                                                 | Living room                         | Room 1            |        |       |      |                         |
|                                                                                 |                                     | Room 2            |        |       |      |                         |
|                                                                                 |                                     | Total (self-fill) |        |       |      |                         |
| Lumber room                                                                     | Used to store farm tools            |                   |        |       |      |                         |
|                                                                                 | Used to store grain                 |                   |        |       |      |                         |
|                                                                                 | Used to store firewood or coal      |                   |        |       |      |                         |
|                                                                                 | Others                              |                   |        |       |      |                         |
| Ancillary facilities room                                                       | Dining room                         |                   |        |       |      | Whether (or not) to use |
|                                                                                 | Kitchen                             |                   |        |       |      |                         |
|                                                                                 | Toilet                              |                   |        |       |      |                         |
| Livestock room<br>(It is need to indicate whether to use in the remarks column) | Livestock room                      |                   |        |       |      |                         |
| Vegetable, orchard patch, etc. in the rural homestead                           | Vegetable patch                     |                   |        |       |      |                         |
|                                                                                 | Orchard patch                       |                   |        |       |      |                         |
| Area of structure                                                               | Base area                           |                   |        |       |      |                         |
|                                                                                 | Building area                       |                   |        |       |      |                         |
| Room for rent<br>(Fill in according to Form 2)                                  | Used for both industry and commerce |                   |        |       |      |                         |
|                                                                                 | Rent out                            | Area              |        |       |      |                         |
|                                                                                 |                                     | Rent (room/month) |        |       |      |                         |

Note: Base area is the floor area of the building. Building area is the total area of the floors measured from the external walls, and the area is equal to the length times width, and then times the number of layers.
